# Supplementary material
Source: Elsevier journal article supplement (https://www.sciencedirect.com/science/article/pii/S1138359320300046)
Supplement: mmc1 [file S1138359320300046:mmc1.doc]

ANEXO 1. Cuestionario de Función Sexual del Hombre, FSH

| 1. SU INTERÉS O DESEO DE REALIZAR ALGÚN TIPO DE ACTIVIDAD SEXUAL HA SIDO:   - Muy bajo o nulo (1) - Bajo (2) - Normal (3) - Alto o muy alto (4)   2. ¿SU CONFIANZA EN ALCANZAR LA ERECCIÓN DURANTE LA ACTIVIDAD SEXUAL HA SIDO?   - Muy baja o nula (1) - Baja (2) - Normal (3) - Alta o muy alta (4)   3. EN SUS RELACIONES SEXUALES ¿HAN TENIDO SUS ERECCIONES LA DUREZA SUFICIENTE PARA LOGRAR LA PENETRACIÓN?   - Nunca o casi nunca (1) - Algunas veces (hasta la mitad de las veces) (2) - La mayoría de veces (más de la mitad de las veces) (3) - Casi siempre - Siempre (4) - No ha habido actividad sexual (0)   4. ¿HA SIDO CAPAZ DE MANTENER LA ERECCIÓN HASTA FINALIZAR LA RELACIÓN SEXUAL?   - Casi siempre - Siempre (4) - La mayoría de veces (más de la mitad de las veces) (3) - Algunas veces (hasta la mitad de las veces) (2) - Nunca o casi nunca (1) Si eligió esta opción señale las causas (una o más):   1. Erección insuficiente   2. Sentir dolor   3. Problemas sexuales de la pareja   4. Otras causas (indicar)____________________________ - No ha habido actividad sexual (0)   5. ¿EYACULÓ USTED ANTES DE DESEARLO DURANTE LA ACTIVIDAD SEXUAL?   - Casi siempre - Siempre (1) - La mayoría de veces (más de la mitad de las veces) (2) - Algunas veces (hasta la mitad de las veces) (3) - Nunca o casi nunca (4) - No ha habido actividad sexual (0)   6. ¿HA NOTADO EXCESIVO RETRASO O INCAPACIDAD PARA EYACULAR EN SUS RELACIONES SEXUALES?   - Casi siempre - Siempre (1) - La mayoría de veces (más de la mitad de las veces) (2) - Algunas veces (hasta la mitad de las veces) (3) - Nunca o casi nunca (4) - No ha habido actividad sexual (0)   7. ¿HA SENTIDO INQUIETUD O MIEDO ANTE LA IDEA O POSIBILIDAD DE TENER ACTIVIDAD SEXUAL?   - Mucha (1) - Bastante (2) - Algo (3) - Nada (4)   8. ¿CUÁNTAS VECES HA SIDO USTED QUIEN HA DADO LOS PASOS INICIALES PARA PROVOCAR UN ENCUENTRO SEXUAL?   - Nunca o casi nunca (1) - Algunas veces (hasta la mitad de las veces) (2) - La mayoría de veces (más de la mitad de las veces) (3) - Casi siempre - Siempre (4)   9. ¿SE HA SENTIDO CONFIADO PARA COMUNICAR A SU PAREJA LO QUE LE GUSTA O DESAGRADA EN SUS ENCUENTROS SEXUALES?   - Nunca o casi nunca (1) - Algunas veces (hasta la mitad de las veces) (2) - La mayoría de veces (más de la mitad de las veces) (3) - Casi siempre – Siempre (4)   10. ¿CUÁNTAS VECES HA TENIDO ACTIVIDAD SEXUAL EN LAS ÚLTIMAS 4 SEMANAS?   - 1-4 veces (1) - De 5 a 8 veces (2) - De 9 a 12 veces (3) - Más de 12 veces (4) - No ha habido actividad sexual (0). Si eligió esta respuesta indique el motivo (una o más respuestas):  1. Falta de deseo o interés 2. Inseguridad o miedo a no responder sexualmente de manera adecuada 3. Dolor o molestias durante la actividad sexual 4. Problemas sexuales de la pareja 5. Otros motivos (describir):________________________________   11. DURANTE LAS ÚLTIMAS 4 SEMANAS SU NIVEL DE SATISFACCIÓN SEXUAL HA SIDO:   - Muy bajo o nulo (1) - Bajo (2) - Normal (3) - Alto o muy alto (4)   12. ¿LE HA SUCEDIDO ALGÚN ACONTECIMIENTO EN LAS ÚLTIMAS 4 SEMANAS QUE HAYA PODIDO INFLUIR EN SU VIDA SEX UAL?: SÍ NO  *Si ha respondido SÍ, por favor descríbalo brevemente: ___________________ _______________________________________________________________*  *¿Cuánto cree que ha influido dicho acontecimiento en su vida sexual?:*  *Mucho Algo Nada* |
| --- |

aInteresados en conocer instrucciones de uso y puntos de corte, entrar en [www.cuestionariosdesalud.com](http://www.cuestionariosdesalud.com/) o contactar con Dr. Froilán Sánchez Sánchez. Sexología Médica. Centro de Salud de Xàtiva. Av de Ausiàs March s/n. 46800-Xàtiva. Valencia. España.

**Anexo 2.** Dominios e ítems del Cuestionario de Función Sexual del Hombre, FSH

|  | Ítems |  |
| --- | --- | --- |
| *Dominios evaluadores de la respuesta sexual (DERS)* |  |  |
| 1-Deseo | 1, 2 | Detectan el tipo de disfunción sexual, su gravedad y la posible presencia de ella en la pareja |
| 2-Función eréctil | 3, 4 |
| 3-Eyaculación prematura | 5 |
| 4-Eyaculación retardada | 6 |
| 5-Frecuencia de actividad sexual | 10 |
| 6-Satisfacción sexual | 11 |
| *Dominios descriptivos de la actividad sexual (DDAS)* |  |  |
| 1-Ansiedad anticipatoria | 7 | Describen aspectos de especial interés en la actividad sexual |
| 2-Iniciativa sexual | 8 |
| 3-Confianza para comunicar preferencias sexuales a la pareja | 9 |
| 12-Acontecimientos recientes con influencia sobre la actividad sexual | 12 |
